# Supplementary material
Source: PubMed Central journal article supplement (PMC2512969)
Supplement: NIHMS62292-supplement-si20070409_051.pdf [file NIHMS62292-supplement-si20070409_051.pdf]

# Intramolecular Single-turnover Reaction in a Cytochrome *c* Oxidase Model bearing a Tyr<sup>244</sup> Mimic

(Supporting Information)

James P Collman,\* Richard A Decréau, Yilong Yan, Jungjoo Yoon, Edward I. Solomon

*Department of Chemistry, Stanford University, Stanford, California 94305-5080*

[jpc@stanford.edu](mailto:jpc@stanford.edu)

## Instrumentation<sup>1</sup>

***EPR Spectroscopy***: Bruker EMX spectrometer; X-band; microwave power, 10.08 mW; microwave frequency: 9.3075 GHz, modulation frequency: 100.0 kHz; modulation amplitude: 20.0 G, Receiver gain:  $5.02 \times 10^3$ ; Resolution in X: 1024; T = 77K. Sample: (0.5-1.0 mM, 100  $\mu$ L) in 2.8 mm o.d diameter EPR tube sealed with a septum (Kontes Stopper Sleeve, Size 7, 774250-0007) and parafilm. Concentration in porphyrin 0.5-2.0 mM

***Mass spectrometry. Nanospray***: Advion/Nanomate; ***Electrospray***: Waters/Micromass Q-ToF Api-vs. Porphyrin in solution in scintillation vial sealed with septum or in borosilicate glass culture tubes (6x50 mm, disposable, Kimble) sealed with a Kontes-septum.

***NMR spectroscopy***. Inova-500. <sup>1</sup>H-NMR carried out at 500 MHz, PTFE-capped NMR tube filled with porphyrin solution (400  $\mu$ L, mm of solvent)

***Resonance Raman spectroscopy***. Spectra were obtained using 407 nm excitation (Kr<sup>+</sup> laser, Coherent I90C-K), power 10 mW. Concentration in porphyrin 0.5-2.0 mM

***UV/Vis spectroscopy*** Hewlett Packard apparatus 8452. Glass cuvette (3 mL capacity) sealed with a 14/24 septum, solvent: THF. Concentration in porphyrin  $2 \times 10^{-6}$ M- $2 \times 10^{-5}$ M.

## Syntheses and Reactivity

**Model 1-** [Copper (I) [Cis- $\alpha_2$ -(*o*-4-(3-methylimidazolyl)-amidophenyl)- $\alpha$ -(*o*-4-(3-(2-hydroxyphenylimidazolyl)-amidophenyl)- $\beta$ -(*o*-3-(1-(5-*p*-trifluoromethylphenyl)imidazolyl methyl)benzamidophenyl) iron (II) porphyrin] hexafluorophosphate, {Cu(I)[Fe(II)( $\alpha_2$ (*N*-MeIm)  $\alpha$ (*N*-(PhOH)Im)  $\beta$ F<sub>3</sub>T-T)]<sup>+</sup> {PF<sub>6</sub>}<sup>-</sup>, Fe/Cu[*N*-Me][*N*-PhOH]PF<sub>6</sub> (**1**)]  
A mixture of free base porphyrin H<sub>2</sub>[*N*-Me]<sub>2</sub>[*N*-PhOH]<sup>2</sup> (10.6  $\mu$ mol, 15 mg) and FeBr<sub>2</sub> (32  $\mu$ mol, 7mg) in MeOH/THF (1:4 vol., 10 mL) was heated for 1h at reflux. The volume was reduced to a 1/3<sup>rd</sup> then 0.1 M aqueous Na<sub>2</sub>.EDTA (1 mL) was introduced and the resulting mixture was stirred for 10 min. Then the volume was expanded with benzene (15 mL), water was added (15 mL) and stirring was continued for 10 more min. The organic phase was then washed with water (4 x 15 mL), and dried by addition of Na<sub>2</sub>SO<sub>4</sub> and stirring for 10 min. After filtration of the porphyrin solution through a glass wool plug, the solvents were distilled under reduced pressure to yield Fe[*N*-Me]<sub>2</sub>[*N*-PhOH] (12.5 mg, 80% yield). An aliquot of Fe[*N*-Me]<sub>2</sub>[*N*-PhOH] (4.1  $\mu$ mol, 6 mg) in THF (1 mL) was mixed with 1 equiv. of CuPF<sub>6</sub>MeCN<sub>4</sub> (100  $\mu$ L taken from a 41 mM stock solution in MeCN (15.3 mg/mL)). The resulting solution was stirred for 10 min and the solvents were removed under vacuum, yielding **1** quantitatively (6.8 mg).

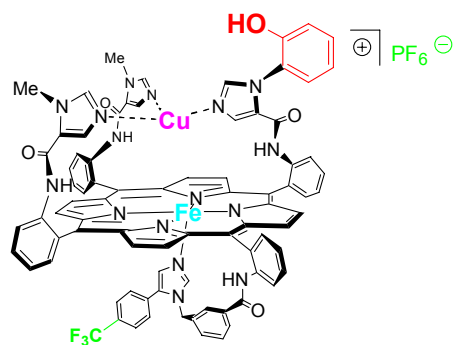

**Fe/Cu [N-Me]<sub>2</sub>[N-PhOH] (1)**

<sup>1</sup>H NMR (500 MHz, CDCl<sub>3</sub>/CD<sub>3</sub>CN/THF-*d*<sub>8</sub>/1 atm CO) δ 9.07 (d, 1H, J = 8.0 Hz), 8.79-8.70 (m, 6H), 8.63-8.61 (m, 2H), 8.53 (d, 1H, J = 8.5 Hz), 8.50 (d, 1H, J = 8.5 Hz), 8.45 (d, 1H, J = 8.5 Hz), 8.29-8.23 (m, 3H), 8.18 (d, 1H, J = 7.5 Hz), 7.66-7.82 (m, 7H), 7.42-7.55 (m, 5H), 7.38 (s, 1H), 7.11 (m, 3H), 7.02 (m, 2H), 6.97 (m, 2H), 6.85 (s, 1H), 6.66 (t, 1H, J = 7.5 Hz), 6.61 (d, 1H, J = 7.0 Hz), 6.57 (d, 1H, J = 7.5 Hz), 6.08 (d, 2H, J = 8.5 Hz), 5.57 (s, 1H), 5.32 (s, 1H), 5.09 (s, 1H), 4.13 (s, 1H), 3.99 (s, 2H), 3.52 (s, 3H), 3.37 (s, 3H), 2.23 (s, 1H), 1.36 (s, 1H). <sup>19</sup>F NMR (376 MHz, CDCl<sub>3</sub>/CD<sub>3</sub>CN/THF-*d*<sub>8</sub> 0.1:4:1 vol./1 atm CO): δ -64.1 (s, 3F), -73.4 ppm (d, 6F, J<sub>FP</sub> = 708 Hz). <sup>31</sup>P NMR (162 MHz, CDCl<sub>3</sub>/CD<sub>3</sub>CN/THF-*d*<sub>8</sub>/1 atm CO): δ 66.9 (7uplet, 1P, J<sub>PF</sub> = 708 Hz). HR-MS (ESI<sup>+</sup>): *m/z* = 1521.3240 [M-PF<sub>6</sub>]<sup>+</sup> (Calcd for C<sub>82</sub>H<sub>57</sub>CuF<sub>3</sub>FeN<sub>16</sub>O<sub>5</sub>: 1521.3395). UV-Vis. (CH<sub>2</sub>Cl<sub>2</sub>) λ (10<sup>-3</sup> x ε/ mol<sup>-1</sup> L cm<sup>-1</sup>): 425 (230), 543 (10).

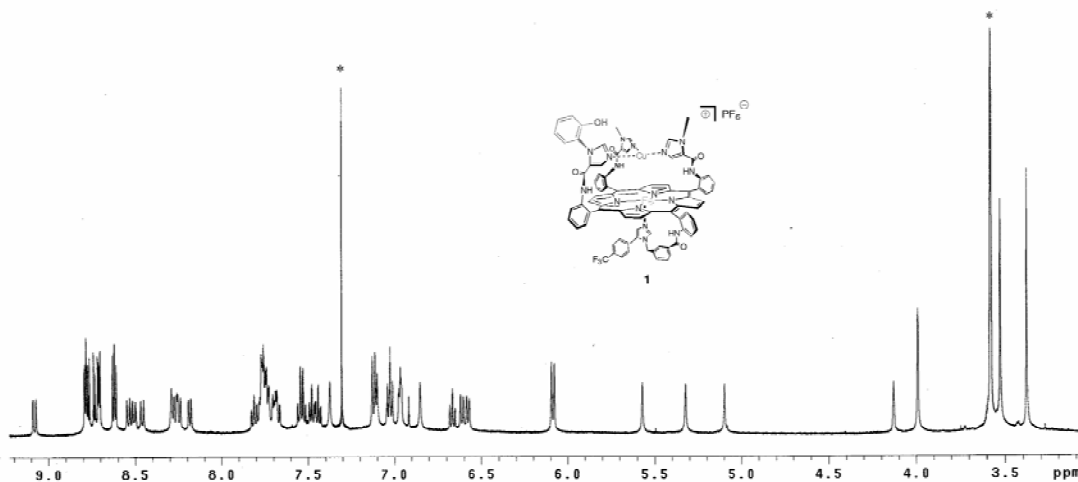

Fig. S1. <sup>1</sup>H-NMR spectrum of Model **1** in CDCl<sub>3</sub>/THF-*d*<sub>8</sub>/CD<sub>3</sub>CN under 1 atm of CO. (solvent peaks are marked with \*).

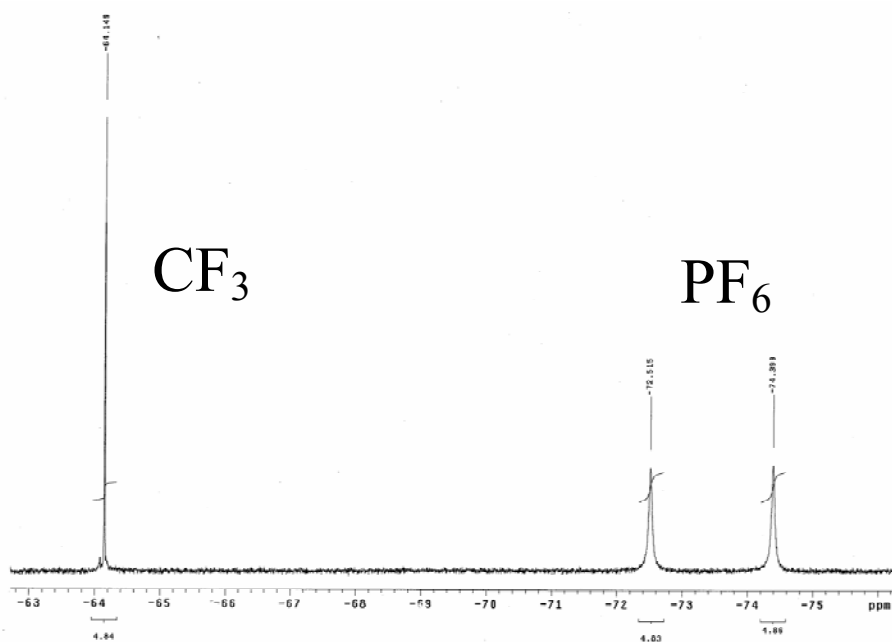

Fig. S2. <sup>19</sup>F-NMR spectrum indicating a 1:1 ratio porphyrin (CF<sub>3</sub> marker): copper (PF<sub>6</sub> counter ion). Integration shows 4.84 (CF<sub>3</sub>), 4.83 (PF<sub>6</sub>), and 4.86 (PF<sub>6</sub>).

**Models Oxy-1 and 2.** A vessel containing a solution of **1** in DMF was frozen, evacuated, back-filled with 1 atm of 100%-O<sub>2</sub>, thawed at -60 °C for 15s, and subjected to three freeze-pump-thaw (-60 °C) cycles. The vessel was plunged in a bath at -40 °C in the dark, and frozen after 20-60 min for EPR and resonance Raman analyses. For reactivity experiments 3 equiv. of PPh<sub>3</sub> were introduced, the mixture was warmed to room temperature and analyzed by TLC and GC as previously described, and showed the formation of triphenylphosphine oxide after comparison with an authentic standard.<sup>1</sup>

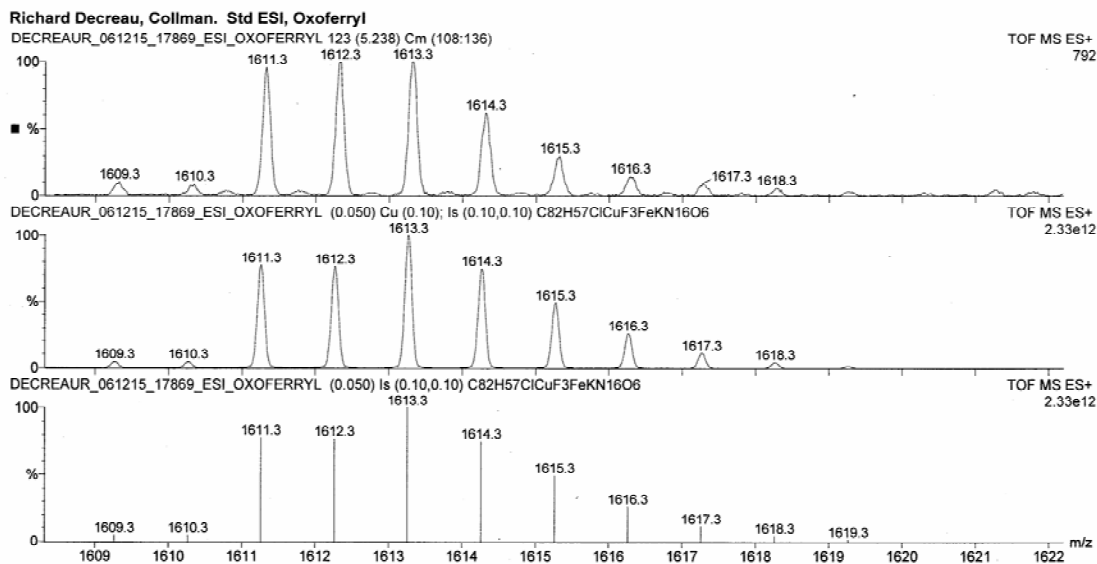

Fig. S3. Experimental (top) and simulated (middle and bottom) mass spectra of a potassium chloride adduct of **2**.

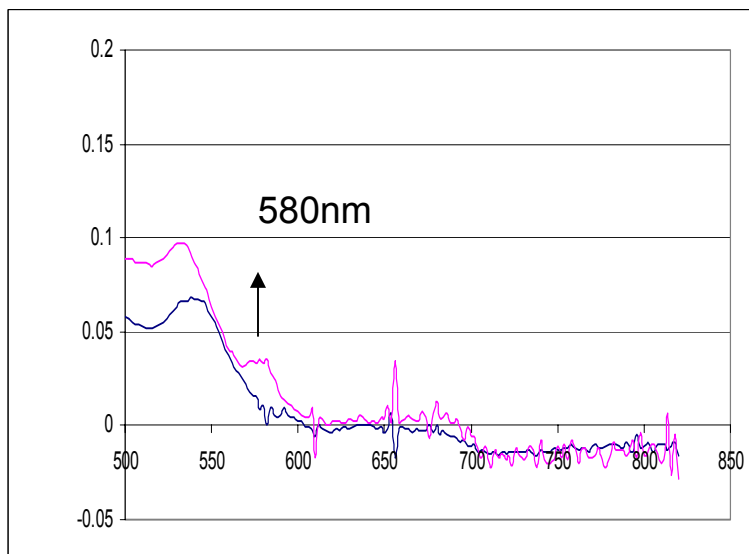

Fig. S4. UV-Vis spectrum of oxy-1 (black) and 2 (purple) in THF.

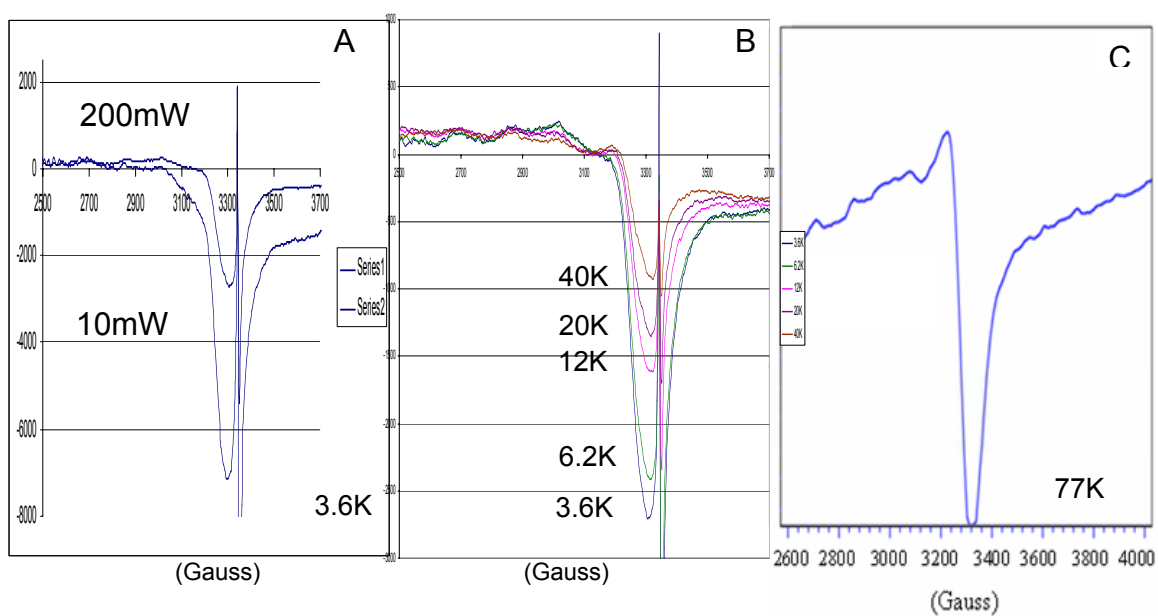

Fig. S5. A- Power dependence of the signal; B- T dependence; C- At 77K

## References

- 1- Conditions were adapted from that previously reported for an intermolecular reaction between phenols and an Fe(III)-superoxide-Cu(I) CcO model: Collman, J. P.; Decréau, R. A.; Sunderland, C. E. *Chem. Com.* **2006**, 3894.
- 2- Collman, J. P.; Decréau, R. A.; Zhang, C. *J. Org. Chem.* **2004**, 69, 3546
